# Genetic Diversity in Circulating Tumor Cell Clusters

Zafarali Ahmed<sup>1</sup>, Simon Gravel<sup>2\*</sup>

<sup>1</sup> Department of Biology, McGill University, Montreal, Quebec, Canada

<sup>2</sup> Department of Human Genetics, McGill University, Montreal, Quebec, Canada

\* [simon.gravel@mcgill.ca](mailto:simon.gravel@mcgill.ca)

## Abstract

Genetic diversity plays a central role in tumor progression, metastasis, and resistance to treatment. Experiments are shedding light on this diversity at ever finer scales, but interpretation is challenging. Using recent progress in numerical models, we simulate macroscopic tumors to investigate the interplay between global growth dynamics, microscopic composition, and circulating tumor cell cluster diversity. We find that modest differences in growth parameters can profoundly change microscopic diversity. Simple outwards expansion leads to spatially segregated clones, as expected, but a modest cell turnover can result in mixing at the microscopic scale, consistent with experimental observations. Whereas simple range expansion models predict maximum diversity at the tumor edge, turnover models predict maximum diversity near the core of the tumor and a higher potency of CTCs for metastasis. Using multi-region sequencing data from a Hepatocellular Carcinoma patient to validate our models, we propose that deep multi-region sequencing is well-powered to distinguish between some of the leading models of cancer evolution. The genetic composition of circulating tumor cell clusters, which can be obtained from non-invasive blood draws, is therefore informative about tumor evolution, the position of origin of the cluster within the tumor, and its metastatic potential. It is therefore a promising tool for both fundamental and medical research.

## Introduction

Most cancer deaths are due to metastasis of the primary tumor, which complicates treatment

and promotes relapse [1–3]. Circulating tumor cells (CTC) are bloodborne enablers of metastasis that can be isolated and genetically characterized [4, 5]. Counts of single CTCs have been used to predict tumor progression [6, 7] and monitor curative and palliative therapies in breast [8, 9] and lung cancers [10]. CTCs have also been isolated in clusters of 2-30 cells [11]. These CTC clusters, though rare, are associated with more aggressive metastatic cancer and poorer survival rates in mice and breast and prostate cancer patients [5].

Cellular growth within tumors follows Darwinian evolution with sequential accumulation of mutations and selection resulting in subclones of different fitness [12, 13]. Certain classes of mutations are known to give cancer cells advantages beyond local growth rates. For example, acquiring mutations in *ANGPTL4* in breast tumors does not appear to provide a growth advantage to cells in the primary, however it enhances metastatic potential to the lungs [14]. Similarly, breast tumors are more likely to metastasize into the lung or brain if they acquire mutations in *TGF $\beta$*  or *ST6GALNAC5*, respectively [14, 15]. These genes are referred to as metastasis progression genes or metastasis virulence genes [1, 16].

Mutations, including those in metastasis progression and virulence genes, are not uniformly distributed in the tumor. Tumors show substantial intratumoral heterogeneity (ITH) [17–19] where subclones have private mutations that can lead to subclonal phenotypes [20–22]. A high degree of ITH can allow tumors to explore a wide range of phenotypes: this might result in a few cancer cells that have a metastatic phenotype in early tumor growth. Additionally, ITH can contribute to therapy resistance and relapse when a treatment is applied during the late tumor stages [3, 23]. Studying ITH is therefore important for cancer progression and will be a key consideration during therapeutic and prognostic decisions [23–25]. To capture the complete mutational spectrum of a primary tumor, multiple samples across a tumor are required: Indeed, this has been the highlight of multiple empirical

92 studies [20–22, 26].

93 Next-generation sequencing (NGS) of single  
94 CTCs has shown that they have similar genetic  
95 composition to both the primary and metastatic  
96 lesions [27]. This opens the way for using CTC  
97 and CTC clusters as a non-invasive liquid biopsy  
98 to study tumors, monitor response to therapy,  
99 and determine patient-specific course of treat-  
100 ment [27–30].

101 Here we ask whether genetic heterogeneity  
102 within individual circulating tumor cell clusters  
103 can be informative about solid tumor progres-  
104 sion. Because CTC clusters are thought to origi-  
105 nate from neighboring cells in the tumor [5], het-  
106 erogeneity within CTC clusters is closely related  
107 to cellular-scale genetic heterogeneity within tu-  
108 mors. We therefore suppose that CTC cluster  
109 diversity is a direct function of diversity in small  
110 cell clusters within the tumor.

111 We used an extension<sup>1</sup> of the simulator de-  
112 scribed in Waclaw *et al.* [31] to study the in-  
113 terplay of tumor dynamics, CTC cluster diver-  
114 sity, and metastatic outlook. We show that fine-  
115 scale tumor heterogeneity, and therefore CTC  
116 cluster composition, depend sensitively on the  
117 tumor growth dynamics and sampling location.  
118 Simulated data is consistent with recent sequenc-  
119 ing experiments, but slightly finer sampling will  
120 provide stringent tests that distinguish between  
121 state-of-the-art models. These findings further  
122 reinforce the utility of fine-scale tumor profiling  
123 and CTC clusters as clinical tools to elucidate  
124 tumor information and clinical outlook [32, 33].

## 125 Results

### 126 Global composition

127 To determine the effect of the growth dynam-  
128 ics on global intra-tumor heterogeneity, we first  
129 consider the allele frequency spectra for differ-  
130 ent turnover models (Fig 1, S1). In all cases,  
131 a majority of driver and passenger genetic vari-  
132 ants are at frequency less than 1%, as expected  
133 from theoretical and empirical observations [34].  
134 Passenger mutations represent the bulk of ITH,

consistent with the theoretical and experimen- 135  
tal evidence that neutral evolution drives most 136  
ITH [35]. For simulations with low to moderate 137  
death rate,  $d = \{0.05, 0.1, 0.2\}$ , we find that the 138  
frequency spectra are indistinguishable between 139  
the three turnover models (Fig 1, S1). This sug- 140  
gests that a low death rate does not affect the 141  
global composition of a tumor. 142

When the death rate is increased to  $d = 0.65$ , 143  
as in [31], the different models produce distinct 144  
frequency spectra (Fig 1b). As in [31], we find 145  
that the number of high-frequency drivers is 146  
higher in the turnover model than in the no 147  
turnover model. Whereas [31] interpreted this 148  
observation as an indication that turnover re- 149  
duces diversity, we find that diversity is in fact 150  
increased for all types of variants and at all fre- 151  
quencies. The number of somatic mutations in 152  
the turnover model is 3.4 times higher than in 153  
the surface turnover model and 6.2 times higher 154  
than in the no turnover model. This is primarily 155  
due to a higher number of cell divisions required 156  
to reach a given tumor size when cell death oc- 157  
curs throughout the tumor (Table S1). The Wa- 158  
claw *et al.* model uses a death rate of  $d = 0.65$ , 159  
which is a staggering 95% of the birth rate. The 160  
turnover model therefore has 8.3 times more cell 161  
divisions to reach a given size, and the surface 162  
turnover has 4 times more cell divisions than the 163  
no turnover model (Table S1). 164

### 165 Cluster diversity depends on sampling 166 position and turnover rate

To study the effect of cluster size, position of 167  
origin, and evolutionary model on CTC cluster 168  
composition, we sampled groups of cells across 169  
tumors. To assess genetic heterogeneity within 170  
clusters, we consider the number of distinct so- 171  
matic mutations,  $S(n)$ , among cells in clusters of 172  
size  $n$ . 173

As expected, we find that larger CTC clus- 174  
ters have more somatic mutations (Fig 2, S2). 175  
By contrast with global diversity patterns, we 176  
find that moderate turnover has a profound im- 177  
pact: Clusters from models with low turnover 178  
have many more somatic mutations than in the 179  
no turnover model (Fig 2a,b). Surface turnover 180

<sup>1</sup><https://github.com/zafarali/tumorheterogeneity>

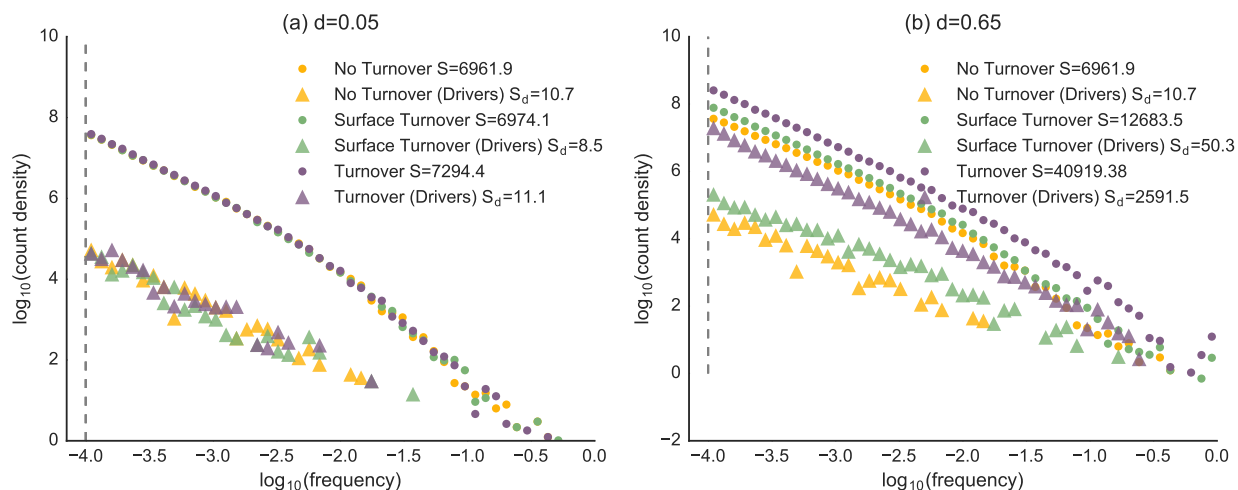

Figure 1: **Frequency Spectra for the Primary Tumor at (a) low death rate and (b) high death rate.** A histogram of the allele frequencies of all mutations (circles) and driver mutations (triangles) in the tumor. (a) At low death rate, the frequency spectra are indistinguishable, whereas for (b) higher death rate, the turnover model produces elevated diversity across the frequency spectrum for both driver and neutral mutations. (a) At low death rate, the frequency spectra are indistinguishable, whereas for (b) higher death rate, the turnover model produces elevated diversity across the frequency spectrum for both driver and neutral mutations. The total number of somatic mutations,  $S$ , and the total number of driver mutations,  $S_d$ , in the tumor is shown in the legend (average of 11 simulations). The gray dotted line shows the minimum frequency mutations returned by the tumor simulator.

181 has little effect on cluster diversity (Fig S2).

182 Fig 2 also shows the relationship between a  
 183 CTC cluster's shedding location (i.e. its dis-  
 184 tance to the tumor center-of-mass when it was  
 185 sampled) and its genetic content. No turnover  
 186 and surface turnover models show similar trends  
 187 of increasing diversity with distance (Fig S2).  
 188 Full turnover models show an opposite trend  
 189 of decreasing diversity with distance in clus-  
 190 ters of intermediate size (Fig 2b-d and S3 for  
 191  $d \in \{0.1, 0.2\}$  and  $\{0.65\}$ , respectively). How-  
 192 ever, these trends revert again when considering  
 193 large clusters with thousands of cells (Fig 3).

### 194 Comparison with multi-region sequenc- 195 ing data

196 To validate predictions of our model, we used  
 197 multi-region sequencing data from a Hepatocel-  
 198 lular Carcinoma (HCC) patient presented in [36]  
 199 (Fig 3a). The HCC data contained 23 sequenced  
 200 samples each with  $\approx 20,000$  cells, therefore we  
 201 used our sampling scheme to produce 23 biopsies  
 202 of comparable sizes (20,000 cells). The distance  
 203 measurements were made using ImageJ [37] and

Fig S1 from [36]. Since [36] could only reli- 204  
 ably call variants at more than 10% frequency, 205  
 we used a similar frequency cutoff in our sim- 206  
 ulations. Interestingly, even though the spatial 207  
 trends in diversity are undetectable in large clus- 208  
 ters (Fig S4), they are restored if we impose 209  
 a frequency cutoff (Fig 3c, d). Therefore, the 210  
 spatial trends strongly depend on our choice of 211  
 sample size and frequency cutoff (Fig S4), with 212  
 low cutoff showing weaker spatial patterns. For 213  
 large samples and low cutoffs, the large number 214  
 of rare, recent variants overwhelms the signal for 215  
 older common variants. Such trends are similar 216  
 across turnover models (Fig 2c, d) and are barely 217  
 detectable with the current sample size (Fig 3b). 218  
 The trends observed in the HCC data (Fig 3a) 219  
 are consistent with these but not significant. 220

Fig 3b shows the number of different samples 221  
 necessary to reliably identify spatial trends. For 222  
 biopsies containing tens of thousands of cells, the 223  
 number of spatially distributed samples needed 224  
 is  $\approx 40$ , roughly twice the size of the HCC 225  
 dataset. Furthermore, these show similar quali- 226  
 tative trends for both models, with an increase 227

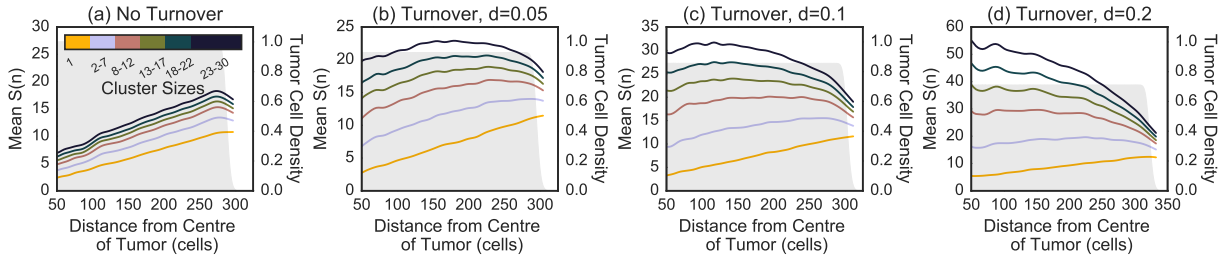

Figure 2: **Number of somatic mutations per cluster** as a function of cluster size and position for a model with (a) no turnover, (b) turnover with  $d = 0.05$ , (c) turnover with  $d = 0.1$  and (d) turnover with  $d = 0.2$ . A higher number of somatic mutations increases the likelihood that a metastatic progression mutation is present. The number of mutations in single CTCs increases at the edge, reflecting the larger number of cell divisions. The trend is reversed for larger clusters with at higher death rate. The shaded gray area represents the density of tumor cells at each position. The smoothed curves were obtained by a Gaussian weighted average using weight  $w_i(x) = \exp(-(x - x_i)^2)$ , with  $x_i$  is the distance from the centre of the tumor.

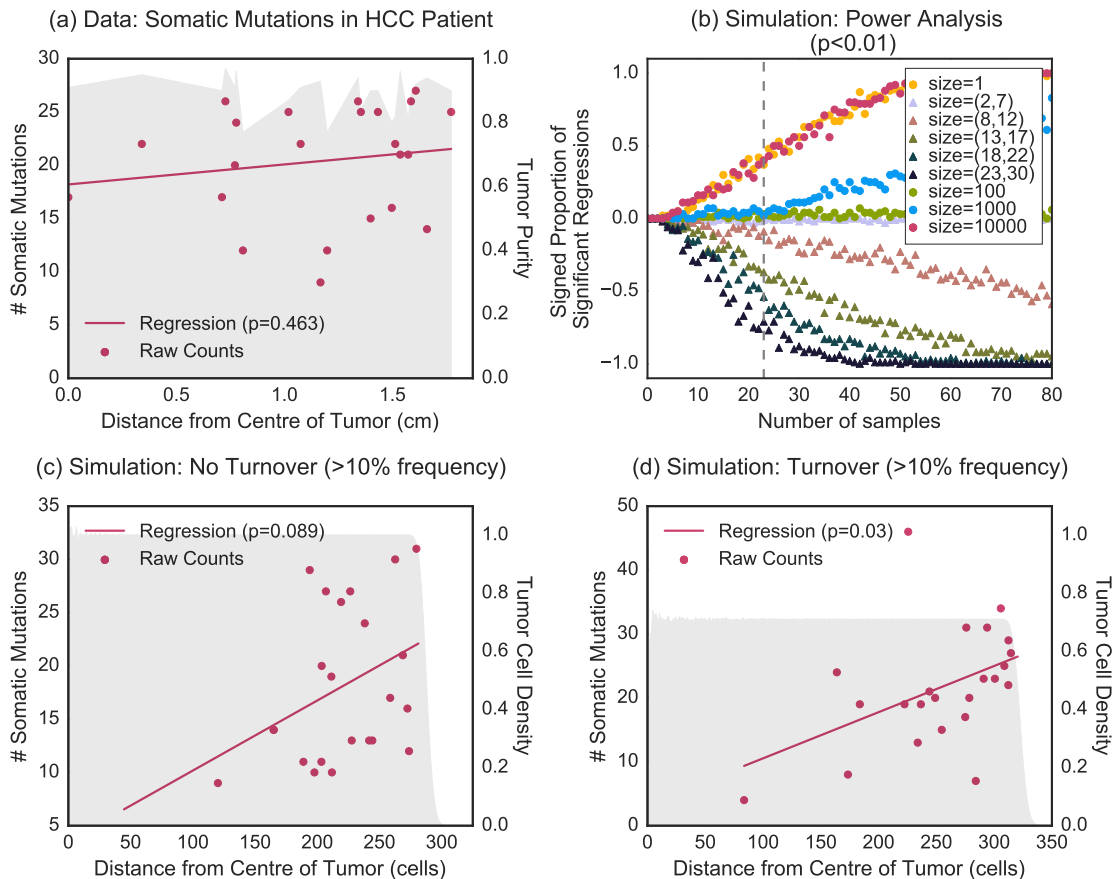

Figure 3: **Comparison of simulated multi-region NGS with empirical hepatocellular carcinoma.** Spatial distribution of the number of somatic mutations of 23 samples (20,000 cells each) in the (a) hepatocellular carcinoma patient, and (c) no turnover and (d) turnover simulated models. (b) shows the number of samples necessary to detect spatial trends from a regression analysis for CTCs and biopsies in the turnover model ( $d = 0.2$ ). The shaded gray area of (a) represents the tumor purity of the samples at each position. The shaded gray area of (c) and (d) represents the density of tumor cells at each position.

228 in diversity at the edge (Fig S5). Alternatively,  
 229  $\approx 30$  small cluster (23-30 cells) samples are  
 230 necessary to detect spatial patterns. Further-  
 231 more, intermediate-sized clusters show qualita-  
 232 tively opposite trends in the different models  
 233 (Fig 3b and S6). Thus small cluster sequenc-  
 234 ing may increase our power in discriminating be-  
 235 tween leading models.

### 236 CTC clusters derived from turnover 237 models are more likely to contain viru- 238 lent mutations

239 Metastasis is an inefficient process [4] in that  
 240 most CTCs are eliminated from the circulatory  
 241 system or fail to survive in the new microenvi-  
 242 ronment. We hypothesize that the genetic com-  
 243 position of CTC clusters influences the likelihood  
 244 of implantation into a new microenvironment.  
 245 More specifically, genetic heterogeneity within  
 246 a cluster may contribute to implantation by in-  
 247 creasing the likelihood that a metastasis progres-  
 248 sion mutation is present. If a cluster has  $S$  so-  
 249 matic mutations, and each mutation has a small  
 250 probability  $p \ll 1$  of being a metastasis progres-  
 251 sion or virulence gene, the probability of hav-  
 252 ing at least one such metastasis virulence gene is  
 253  $1 - (1 - p)^S \approx Sp$ .

254 Diverse CTC clusters do not carry more viru-  
 255 lent mutations, on average, than homogeneous  
 256 ones, but they are more likely to carry *some* viru-  
 257 lent mutations because of the increased diver-  
 258 sity. Unless implantation probability is exactly  
 259 proportional to the number of cells carrying viru-  
 260 lent mutations in a cluster, which seems unlikely,  
 261 diversity will impact implantation rate.

262 To compare the increased likelihood that CTC  
 263 clusters possess metastatic progression genes  
 264 compared to single CTCs, we determine the rela-  
 265 tive increase in the number of distinct somatic  
 266 mutations in a CTC cluster versus a single CTC  
 267 termed *cluster advantage*,  $A(n)$ . To disentangle  
 268 the contributions from the microscopic and  
 269 macroscopic diversity, as well as cluster size ef-  
 270 fects, we compute the cluster advantage for clus-  
 271 ters composed of neighboring cells, as well as for  
 272 random sets of cells sampled across the tumor  
 273 (Fig 4).

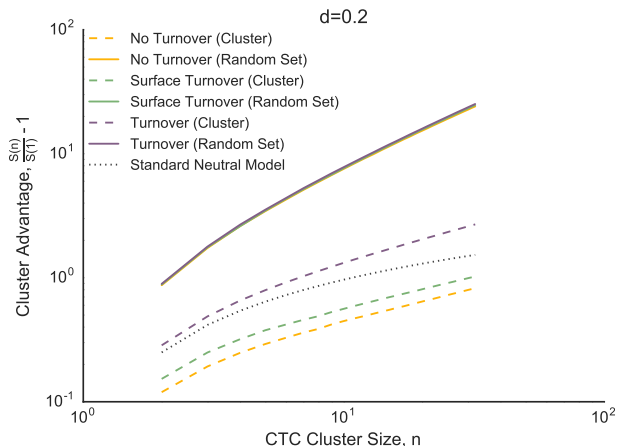

Figure 4: ‘Cluster advantage’  $A(n)$ , or the increase in number of distinct somatic mutations in a CTC cluster relative to single CTC, as a function of cluster size for a random subset of 500 clusters drawn uniformly across the tumor. A law of diminishing returns applies to all models because of redundancy of mutations. The turnover model shows a 2-fold increase in the cluster advantage over the no turnover model.

274 Whereas randomly sampled sets of cells show  
 275 similar and almost linear increase of the cluster  
 276 advantage with sample size, cell clusters show  
 277 more variability. Turnover models have the  
 278 highest cluster advantage, followed by the sur-  
 279 face turnover model, and the no turnover model  
 280 (Fig 4). Higher turnover increases the cluster  
 281 advantage (Fig S7). Even low turnover with a  
 282 death rate of  $d = 0.05$  doubles the cluster ad-  
 283 vantage compared to the no turnover and surface  
 284 turnover model (Fig S7).

## 285 Discussion

286 Even though the results of our simulations are  
 287 consistent with Waclaw *et al.* at the tumor-  
 288 wide level [31], we reach opposite conclusions  
 289 about the effect of cell turnover on genetic di-  
 290 versity. Waclaw *et al.* argued that turnover  
 291 reduces diversity based on the observation that  
 292 more high-frequency variants were observed in  
 293 the tumor with turnover: A small number of  
 294 clones make up a larger proportion of the tumor.  
 295 Even though we can reproduce the observation,  
 296 we find that turnover models in fact vastly *in-*



crease diversity according to more conventional metrics, for example by increasing the number of somatic mutations (by  $\approx 5.9\times$ ) across the frequency spectrum. Both the increase in dominant clone frequency and increased overall diversity have the same simple origin: A tumor model with turnover requires more cell divisions to reach a given size. An early driver mutation has more time to realize a selective advantage and occupy a high fraction of the tumor, but carrier cells are also more likely to accumulate new mutations along the way leading to increased diversity (Fig 1 and Table S1).

The impact of turnover on cellular heterogeneity is particularly pronounced when considering small cell clusters. These fine-scale patterns, observed in Figs 2 and S2, can be interpreted by considering the expansion dynamics of each model and their impact on cell division and mixing. In all turnover models, the number of somatic mutations in a given cell is  $\approx 2.75\times$  higher at the edges than at the center of the tumor, reflecting the higher number of divisions to reach the edge: The center of the tumor is occupied early, which slows down cell division.

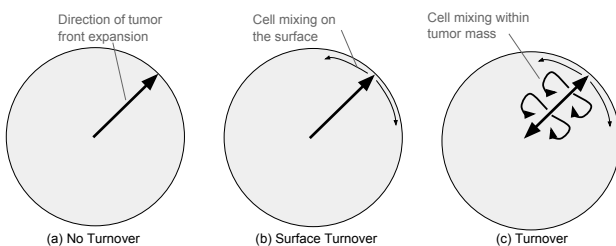

**Figure 5: Migration and Quiescent Core Explains Spatial Patterns** (a) In the no turnover model, the tumor front expands in the outward direction with no cell dying. There is little to no mixing and no divisions in the core: The number of somatic mutations increases with distance from the tumor center. (b) In the surface turnover model, the cells dying on the surface permit a small amount of mixing. This accounts for the higher number of somatic mutations per cluster. We still find increased diversity at the edge of the tumor because of the quiescent core. (c) In the turnover model, cells that die within the tumor can be replaced by cells from the surface as well as cells from the center.

In the no turnover and surface turnover models, cell clusters show the same overall pattern of additional diversity at tumor edge. In the

turnover model, however, we observe the opposite pattern: Even though edge *cells* still carry the most mutations, core *clusters* are now more diverse than edge clusters.

Turnover increases diversity by increasing the number of cell divisions required to reach a given size, especially in the core. More cell divisions lead to more somatic mutations in single cells: core cells in the model with  $d = 0.2$  have  $\approx 3.99$  somatic mutations, compared to  $\approx 1.83$  for the no turnover model. However, this has only a modest effect on the spatial patterns of diversity: without turnover, the number of somatic mutations per cell is 3.5 times higher at the edge than in the core, and the ratio is reduced to 2.2 when turnover is present ( $d = 0.2$ ).

More importantly for diversity, turnover allows for mixing of cells from nearby clones (Fig 5c). This mixing has a smaller effect at the edge of the tumor, where the range expansion produces serial bottlenecks which reduce the effective population size relative to the tumor core. For moderate cluster sizes, this differential mixing effect overwhelms the “number of divisions” effect, and core clusters are much more diverse than edge clusters, producing distinctive gradients of diversity.

The difference in somatic diversity between single CTCs and CTC clusters, measured through the cluster advantage, follows the expected law of diminishing returns: the more cells in the cluster, the fewer the number of unique mutations per cell. However, the trends vary by growth model and cluster origin. Cell mixing afforded by turnover reduces neighboring cell similarity and increases cluster advantage.

Under the assumption that the presence or absence of a metastatic progression allele modulates metastatic potential of tumor cell clusters, the proportion of metastatic lesions that derive from circulating tumor cell clusters is highest in the turnover model. We can think of this as interference occurring between cells within a cluster. Alternately, this is an illustration of the advantage of not putting all one’s egg in the same basket, applied to tumor metastasis: Assuming that there is a chance component to cluster im-

372 plantation, mixing increases the likelihood that  
373 at least one virulence cell makes it to a hospitable  
374 site. Such an effect should be robust to details  
375 of the growth model.

376 In experiments, CTC clusters derived from  
377 primary breast and prostate tumors produced  
378 more aggressive metastatic tumors [5] compared  
379 to single CTCs. This is likely due to differences  
380 in mechanical properties of the cluster or the cre-  
381 ation of a locally favorable environment by the  
382 cluster, rather than by genetic differences. How-  
383 ever, the present analysis suggests that this ad-  
384 vantage can be enhanced by diversity within the  
385 cluster.

386 Both fine-scale mixtures of cell phenotypes  
387 and clonally constrained mutations have been  
388 observed experimentally in tumors [17, 20]. Sim-  
389 ilarly, multi-region sequencing revealed high tu-  
390 mor heterogeneity in clear cell renal carcinoma  
391 (ccRCC) [22], but low levels in lung adenocar-  
392 cinomas [21]. This strongly suggests that the  
393 amount of migration and mixing varies substan-  
394 tially across tumors, with ccRCC data being bet-  
395 ter described by a model with turnover, whereas  
396 lung adenocarcinoma data more closely resem-  
397 bles a model with low or no turnover.

398 Distinguishing between migration effects,  
399 turnover effects, and tumor growth idiosyn-  
400 crasies is obviously challenging. Among limi-  
401 tations of our model, we note the assumption  
402 of spherical tumor shape and the absence of  
403 complex physical constraints (which HCC tu-  
404 mors may experience). Another limitation of  
405 the present model is the rigid computational grid  
406 which prevents cells from pushing each other out  
407 of the way, which constrains growth rate in the  
408 center of the tumor. This constraint plays a role  
409 in reducing diversity at the center of the tumor,  
410 but it may not be realistic in the earlier stages  
411 of tumor growth.

412 The importance of such effects is largely un-  
413 known, and it is likely to vary between tumors  
414 and tumor types. Fortunately, we have shown  
415 that we are at the cusp of being able to test  
416 such models quantitatively. A sampling experi-  
417 ment with twice as many samples than were col-  
418 lected in the HCC patient studied above would

enable us to either validate or reject the current  
state-of-the-art models (Fig 3b), and sequenc-  
ing of small clusters would further allow us to  
discriminate between the different models stud-  
ied here. The HCC data is from whole exome  
sequencing, as are most deep tumor sequencing  
datasets. We expect that power would be fur-  
ther increased in a whole-genome sequencing ex-  
periment, however, we were unable to perform  
whole-genome simulations due to memory con-  
straints.

Future data collection schemes including the  
lung TRACERx study [24] will help us put the  
state-of-the-art models to the test and identify  
such important parameters of tumor growth.  
Given our power analysis, we find that sequenc-  
ing small contiguous cell clusters provides a  
richer picture of tumor dynamics compared to  
larger biopsies, with little to no loss in power,  
assuming that few-cell sequencing can be per-  
formed accurately.

This work set out to answer two simple ques-  
tions: First, should we expect substantial hetero-  
geneity at the cellular scale within tumors and  
within circulating tumor cell clusters? The an-  
swer to the first question is most likely yes, as  
even the models with no turnover exhibit mea-  
surable cluster heterogeneity.

The second question was whether this het-  
erogeneity, sampled through liquid biopsies or  
multi-region sequencing, is informative about tu-  
mor dynamics. Given that state-of-the-art mod-  
els produce very different predictions about the  
level of cluster heterogeneity, the answer is also  
positive. This work identified some of the key  
factors that determine cluster diversity, espe-  
cially the interaction between range expansion,  
cell turnover, and mixing. Even if no diversity  
were observed at all in CTC clusters, it would  
enable us to reject the present models in favor  
of models including additional biological factors  
that favor the clustering of genetically similar  
cells. Measuring diversity, or the lack of di-  
versity, within circulating tumor cell clusters or  
fine-scale multi-region sequencing is therefore a  
promising tool for both fundamental and medi-  
cal oncology.

## 466 Acknowledgments

We thank Julien Jouganous, Hamid Nikbakht, Yasser Riazalhosseini, and Robert Sladek for useful discussions. This research was made possible thanks to a Canadian Institutes of Health Undergraduate Research Award in computational biology, funding reference numbers 139962 and 145987. This research was undertaken, in part, thanks to funding from the Canada Research Chairs program and a Sloan research fellowship.

## References

- [1] D. X. Nguyen, P. D. Bos, and J. Massagué. “Metastasis: from dissemination to organ-specific colonization”. In: *Nature Reviews Cancer* 9.4 (2009), pp. 274–284.
- [2] S. A. Eccles and D. R. Welch. “Metastasis: recent discoveries and novel treatment strategies”. In: *The Lancet* 369.9574 (2007), pp. 1742–1757.
- [3] C. Holohan et al. “Cancer drug resistance: an evolving paradigm”. In: *Nature Reviews Cancer* 13.10 (2013), pp. 714–726.
- [4] J. Massagué and A. C. Obenauf. “Metastatic colonization by circulating tumour cells”. In: *Nature* 529.7586 (2016), pp. 298–306.
- [5] N. Aceto et al. “Circulating tumor cell clusters are oligoclonal precursors of breast cancer metastasis”. In: *Cell* 158.5 (2014), pp. 1110–1122.
- [6] M. Cristofanilli et al. “Circulating tumor cells, disease progression, and survival in metastatic breast cancer”. In: *New England Journal of Medicine* 351.8 (2004), pp. 781–791.
- [7] M. Cristofanilli et al. “Circulating tumor cells: a novel prognostic factor for newly diagnosed metastatic breast cancer”. In: *Journal of Clinical Oncology* 23.7 (2005), pp. 1420–1430.
- [8] B. Rack et al. “Circulating tumor cells predict survival in early average-to-high risk breast cancer patients”. In: *Journal of the National Cancer Institute* 106.5 (2014), dju066.
- [9] D. F. Hayes et al. “Circulating tumor cells at each follow-up time point during therapy of metastatic breast cancer patients predict progression-free and overall survival”. In: *Clinical Cancer Research* 12.14 (2006), pp. 4218–4224.
- [10] S. Maheswaran et al. “Detection of mutations in EGFR in circulating lung-cancer cells”. In: *New England Journal of Medicine* 359.4 (2008), pp. 366–377.
- [11] D. Marrinucci et al. “Fluid biopsy in patients with metastatic prostate, pancreatic and breast cancers”. In: *Physical biology* 9.1 (2012), p. 016003.
- [12] P. C. Nowell. “The clonal evolution of tumor cell populations”. In: *Science* 194.4260 (1976), pp. 23–28.
- [13] M. Greaves and C. C. Maley. “Clonal evolution in cancer”. In: *Nature* 481.7381 (2012), pp. 306–313.
- [14] D. Padua et al. “TGF $\beta$  primes breast tumors for lung metastasis seeding through angiopoietin-like 4”. In: *Cell* 133.1 (2008), pp. 66–77.
- [15] P. D. Bos et al. “Genes that mediate breast cancer metastasis to the brain”. In: *Nature* 459.7249 (2009), pp. 1005–1009.
- [16] D. X. Nguyen and J. Massagué. “Genetic determinants of cancer metastasis”. In: *Nature Reviews Genetics* 8.5 (2007), pp. 341–352.
- [17] N. Navin et al. “Inferring tumor progression from genomic heterogeneity”. In: *Genome Research* 20.1 (2010), pp. 68–80.
- [18] A. Sottoriva et al. “A Big Bang model of human colorectal tumor growth”. In: *Nature genetics* 47.3 (2015), pp. 209–216.



- [19] N. McGranahan and C. Swanton. “Biological and therapeutic impact of intratumor heterogeneity in cancer evolution”. In: *Cancer Cell* 27.1 (2015), pp. 15–26.
- [20] L. R. Yates et al. “Subclonal diversification of primary breast cancer revealed by multiregion sequencing”. In: *Nature medicine* 21.7 (2015), pp. 751–759.
- [21] J. Zhang et al. “Intratumor heterogeneity in localized lung adenocarcinomas delineated by multiregion sequencing”. In: *Science* 346.6206 (2014), pp. 256–259.
- [22] M. Gerlinger et al. “Genomic architecture and evolution of clear cell renal cell carcinomas defined by multiregion sequencing”. In: *Nature genetics* 46.3 (2014), pp. 225–233.
- [23] C. Hiley et al. “Deciphering intratumor heterogeneity and temporal acquisition of driver events to refine precision medicine”. In: *Genome Biology* 15.8 (2014), p. 453.
- [24] M. Jamal-Hanjani et al. “Tracking genomic cancer evolution for precision medicine: the lung TRACERx study”. In: *PLoS Biology* 12.7 (2014), e1001906.
- [25] A. A. Alizadeh et al. “Toward understanding and exploiting tumor heterogeneity”. In: *Nature Medicine* 21.8 (2015), pp. 846–853.
- [26] M. Gerlinger et al. “Intratumor heterogeneity and branched evolution revealed by multiregion sequencing”. In: *New England Journal of Medicine* 2012.366 (2012), pp. 883–892.
- [27] E. Heitzer et al. “Complex tumor genomes inferred from single circulating tumor cells by array-CGH and next-generation sequencing”. In: *Cancer research* 73.10 (2013), pp. 2965–2975.
- [28] A. A. Powell et al. “Single cell profiling of circulating tumor cells: transcriptional heterogeneity and diversity from breast cancer cell lines”. In: *PloS one* 7.5 (2012), e33788.
- [29] M. G. Krebs et al. “Molecular analysis of circulating tumour cells-biology and biomarkers.” In: *Nature Reviews Clinical Oncology* 11.3 (2014), pp. 129–44.
- [30] C. L. Hodgkinson et al. “Tumorigenicity and genetic profiling of circulating tumor cells in small-cell lung cancer”. In: *Nature medicine* 20.8 (2014), pp. 897–903.
- [31] B. Waclaw et al. “A spatial model predicts that dispersal and cell turnover limit intratumour heterogeneity”. In: *Nature* 525.7568 (2015), pp. 261–264.
- [32] J. Mateo et al. “The promise of circulating tumor cell analysis in cancer management”. In: *Genome biology* 15.8 (2014), p. 448.
- [33] M. Ignatiadis, M. Lee, and S. S. Jeffrey. “Circulating tumor cells and circulating tumor DNA: challenges and opportunities on the path to clinical utility”. In: *Clinical Cancer Research* 21.21 (2015), pp. 4786–4800.
- [34] Y. Wang et al. “Clonal evolution in breast cancer revealed by single nucleus genome sequencing”. In: *Nature* 512.7513 (2014), pp. 155–160.
- [35] M. J. Williams et al. “Identification of neutral tumor evolution across cancer types”. In: *Nature Genetics* 48 (2016), pp. 238–244.
- [36] S. Ling et al. “Extremely high genetic diversity in a single tumor points to prevalence of non-Darwinian cell evolution”. In: *Proceedings of the National Academy of Sciences* 112.47 (2015).
- [37] C. A. Schneider, W. S. Rasband, and K. W. Eliceiri. “NIH Image to ImageJ: 25 years of image analysis”. In: *Nature Methods* 9.7 (2012), p. 671.
- [38] O. Hallatschek et al. “Genetic drift at expanding frontiers promotes gene segregation”. In: *Proceedings of the National Academy of Sciences* 104.50 (2007), pp. 19926–19930.

- [39] D. Shweiki et al. “Induction of vascular endothelial growth factor expression by hypoxia and by glucose deficiency in multi-cell spheroids: implications for tumor angiogenesis”. In: *Proceedings of the National Academy of Sciences* 92.3 (1995), pp. 768–772.
- [40] J. M. Hou et al. “Clinical significance and molecular characteristics of circulating tumor cells and circulating tumor microemboli in patients with small-cell lung cancer”. In: *Journal of Clinical Oncology* 30.5 (2012), pp. 525–532.
- [41] R. Durrett. *Probability models for DNA sequence evolution*. Springer Science & Business Media, 2008.

## Supporting Information

### Methods

#### Tumor growth model

To simulate the growth of solid tumors, we use TumorSimulator [31]. The software is able to simulate a tumor containing  $10^8 - 10^9$  cells, or roughly 2 cubic centimeters, in 24 core-hours. The tumor consists of cells that occupy points in a 3D lattice. Empty lattice sites are assumed to contain normal cells which are not modelled in TumorSimulator.

Each cell has an associated list of genetic alterations which represent single nucleotide polymorphisms (SNPs) that can be either passenger or driver. Driver mutations increase the growth rate by a factor  $1 + s$ , where  $s \geq 0$  is the average selective advantage of a driver mutation.

At  $t = 0$ , the simulation begins with a single cell that already has an unlimited growth potential. The TumorSimulator algorithm then proceeds to grow the tumor through the following steps:

1. Select a random cell to be the mother cell.
2. Set the cell birth rate to  $b' = b(1+s)^k$ , where  $b$  is the initial tumor birth rate,  $s$  is the average selective advantage of a driver mutation, and  $k$  is the number of driver mutations present in the mother cell.
3. Randomly select a lattice point adjacent to the mother cell. If empty, create a genetically identical daughter cell at that position with a probability proportional to the birth rate,  $b'$ . If no cell created, or no empty sites are found proceed to 5.
4. Independently give mother and daughter cells additional passenger and driver mutation. The number of passenger and driver mutations are drawn according to Poisson distributions with mean  $\lambda_p$  and  $\lambda_d$ , respectively, and are drawn independently for the mother and daughter cell. Each mutation is unique and there is no back-mutations or recurrent mutations.

5. Kill (i.e., remove) the mother cell with probability proportional to the death rate  $d$ .
6. Update time by a small increment  $dt = 1/(b_{max}N)$ , where  $N$  is the total number of cancer cells in the tumor and  $b_{max}$  is the maximum birth rate in the population of cells.

We consider three turnover scenarios corresponding to three values of the death rate  $d$ : (i) No turnover ( $d = 0$ ), corresponding to simple clonal growth [38]; (ii) Surface Turnover ( $d(x, y, z) > 0$  only if  $x, y, z$  is on the surface), corresponding to a quiescent core model [39] (iii) Turnover ( $d > 0$  everywhere), a model favored in [31] to explore ITH.

The birth rate ( $b = \ln(2)$ ), and selective advantage ( $s = 1\%$ ) were kept consistent with [31]. In addition to varying the turnover model (full, surface, or none), we vary its intensity by controlling the death rate,  $d \in \{0.05, 0.1, 0.2, 0.65\}$ . TumorSimulator also has a parameter that controls migration of cells to form new independent cancer lesions. We did not allow such local migrations, as they would have little effect on the very fine-scale diversity in the primary tumor. We tried two values for the passenger mutation rate:  $\lambda_p = 0.02$  to facilitate comparison with simulations from [31], and  $\lambda_p = 0.0375$  to match effective experimental observations from [36].

#### CTC cluster synthesis

Experimental evidence suggests that CTC clusters are formed from neighboring cells in the primary tumor and not by agglomeration or proliferation of single CTCs in the blood [5, 40]. To represent circulating tumor cell clusters, we therefore sampled spherical clusters (with a large radius) of cells in different areas of the tumor produced by the Waclaw *et al.* model. To get a fixed number of cells in the cluster,  $n$ , we picked the  $n$  closest cells to the center-of-mass of this sphere. We varied the number of cells in the cluster from  $n = 2$  to  $n = 30$  to allow comparison to empirical findings [11].

## Power Analysis

To establish the effectiveness of sequencing CTC clusters versus larger biopsies at detecting a trend and distinguishing between models, we conduct a power analysis. We do a linear regression on the number of somatic mutations per cluster (or biopsy) of size  $n$  as a function of distance from the center-of-mass (i.e,  $S(n, r) = mr + c$  where  $m$  and  $c$  are discovered by the inference technique). We count the number of regressions that were significant ( $p < 0.01$ ): This is denoted as the proportion of significant regressions (out of 100). To capture the direction of the slope, we calculate the sign of the coefficient  $m$  and report the *signed* proportion of significant regressions.

## Standard Neutral Model for Cluster Advantage

The relative increase in the number of distinct somatic mutations in a CTC cluster versus a single CTC is given by the *cluster advantage*, i.e.,  $A(n) = \frac{S(n) - S(1)}{S(1)} = \frac{S(n)}{S(1)} - 1$ , where  $S(n)$  is the number of somatic mutations in a cluster of size  $n$  and  $S(1)$  is the number of somatic mutations in the cell closest to the center-of-mass of the cluster (as described in Section ). A higher cluster advantage indicates that a CTC cluster is more potent relative to a single CTC from the same tumor. In other words, a higher cluster advantage means less genetic redundancy within a cluster. To compare how clusters would behave under a model with no selection, we consider the *Standard Neutral Model*. We make the infinite sites assumptions, and therefore the expected number of somatic mutations in a sample of size  $n$ ,  $S(n)$ , is proportional to the expected number of segregating sites,  $S'(n)$ . This is given by  $E(S'(n)) = \mu H(n-1)$  [41], where  $H(n)$  is the  $n$ -th harmonic number,  $\sum_{i=1}^n \frac{1}{i}$ .

## Code Availability

The code to reproduce simulations, analysis and figures can be found at <https://github.com/zafarali/tumorheterogeneity>.



Table 1: Average number of generations for a cell in each model (estimated from the number of somatic mutations per cell divided by the mutation rate).

| Average Number of Divisions in Model<br>(mutation rate = 0.02, birth rate = 0.69) |                    |                    |                     |
|-----------------------------------------------------------------------------------|--------------------|--------------------|---------------------|
| Death Rate ( $d$ )                                                                | No Turnover        | Surface Turnover   | Turnover            |
| 0.05                                                                              | $218.23 \pm 13.99$ | $216.51 \pm 13.99$ | $224 \pm 11.00$     |
| 0.1                                                                               | $218.23 \pm 13.99$ | $219.73 \pm 7.11$  | $239.38 \pm 8.06$   |
| 0.2                                                                               | $218.23 \pm 13.99$ | $227.27 \pm 6.24$  | $279.80 \pm 13.00$  |
| 0.65                                                                              | $218.23 \pm 13.99$ | $439.90 \pm 18.21$ | $1799.05 \pm 55.81$ |

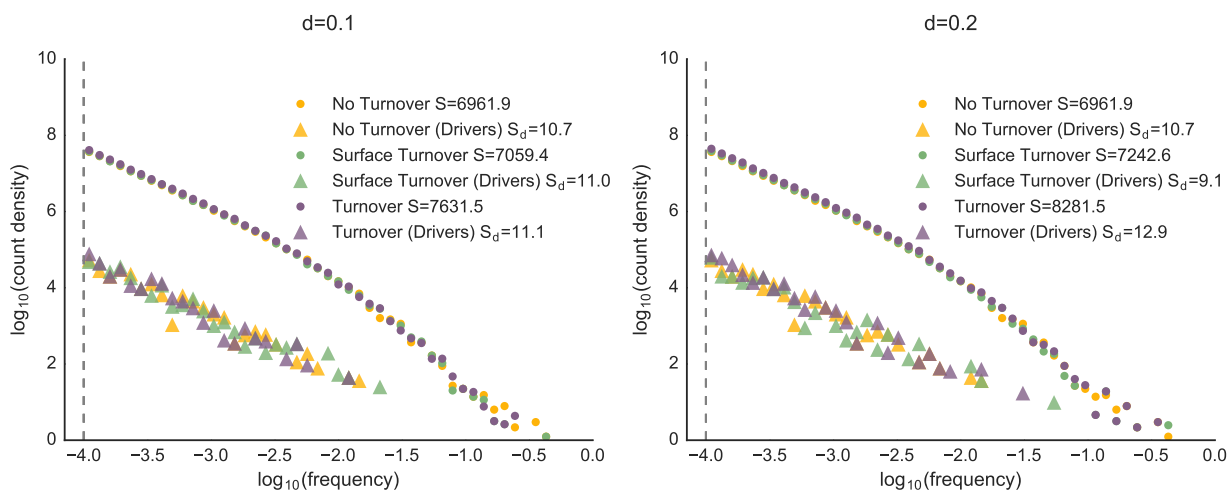

Supplementary Figure 1: Allele frequency spectra for low death rates,  $d \in \{0.1, 0.2\}$  are indistinguishable.

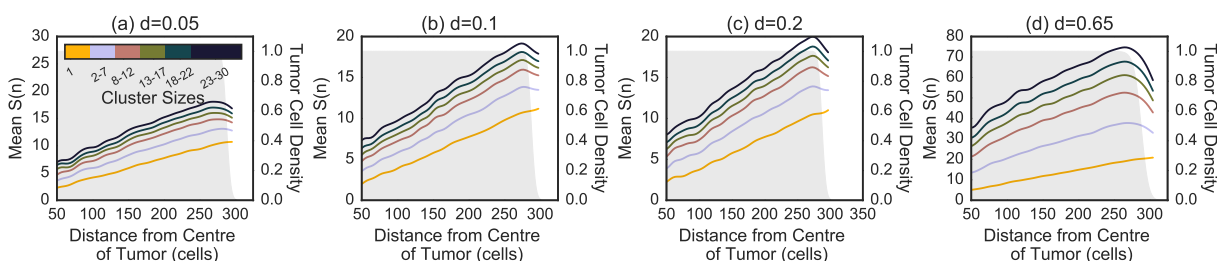

Supplementary Figure 2: The spatial distribution of the number of somatic mutations per cluster in the surface turnover model with death rates (a)  $d = 0.05$ , (b)  $d = 0.1$ , (c)  $d = 0.2$  and (d)  $d = 0.65$ .

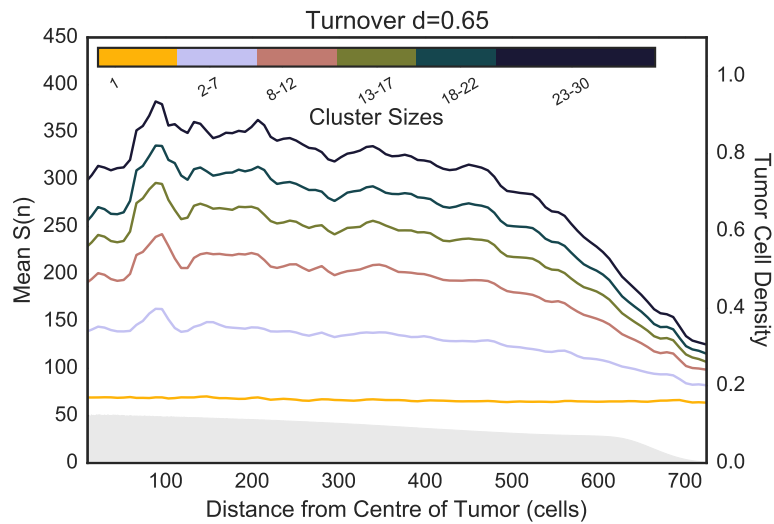

Supplementary Figure 3: The spatial distribution of the number of somatic mutation per cluster in a turnover model with  $d = 0.65$ .

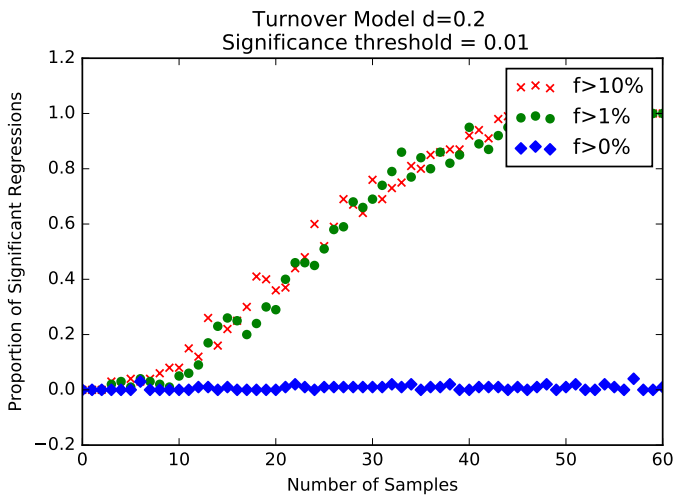

Supplementary Figure 4: The power to detect spatial trends in diversity as a function of the frequency cutoff. With no frequency cutoff, the number of rare variants in a large biopsy ( $n = 20,000$  cells) overwhelms the detectable spatial pattern contributed by common variants.

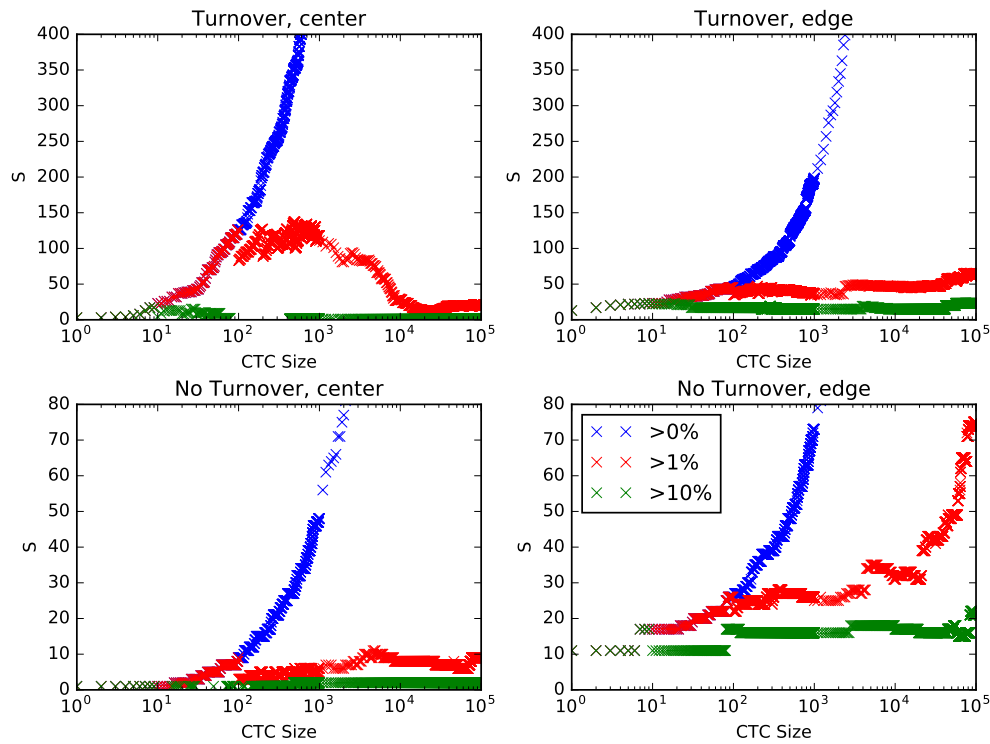

Supplementary Figure 5: Number of somatic mutations observed in a sample as a function of the CTC size compared between the tumor center and edge.

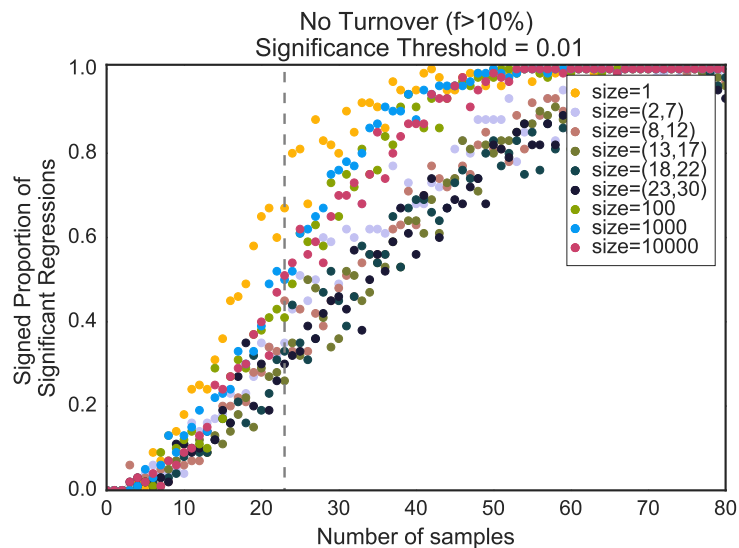

Supplementary Figure 6: The number of samples necessary to detect spatial trends from a regression analysis for CTCs and biopsies in the no turnover model.

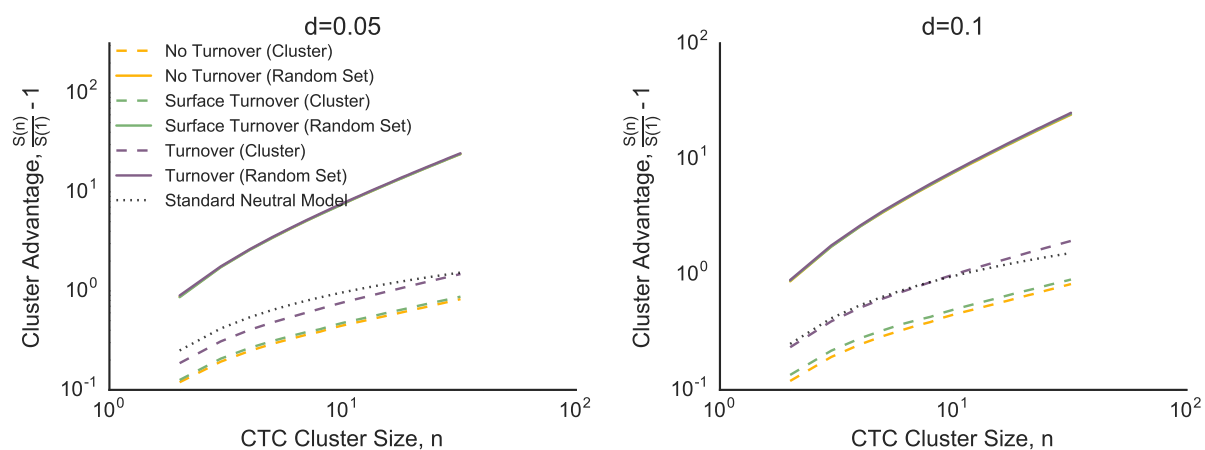

Supplementary Figure 7: Cluster advantage for weak turnover models: even weak mixing (turnover model with  $d = 0.05$ ) can lead to substantial differences in the cluster advantage.
